# Supplementary material for: Pentylenetetrazole-induced seizures in developing rats prenatally exposed to valproic acid
Source: PeerJ. 2016 Nov 29;4:e2709. doi: 10.7717/peerj.2709 (PMC5131616; doi:10.7717/peerj.2709)
Supplement: Supplemental Information 1 [file peerj-04-2709-s001.xlsx]

## Sheet: Content and links
	Este documento se ha exportado de Numbers. Cada tabla se ha convertido en una hoja de cálculo de Excel. Los demás objetos de las hojas de Numbers se han colocado en distintas hojas de cálculo. Recuerde que el cálculo de fórmulas puede ser diferente en Excel.
	Nombre de hoja de Numbers	Nombre de tabla de Numbers	Nombre de hoja de cálculo de Excel
	Birth rate and body weight
		body weight VPA males	Birth rate and body weight - bo
		body weight	Birth rate and body weight - b1
		body weight VPA Females	Birth rate and body weight - b2
		body weight SS males	Birth rate and body weight - b3
		body weight SS females	Birth rate and body weight - b4
		Tabla 1	Birth rate and body weight - Ta
		Pups per litter	Birth rate and body weight - Pu
		Cruzas	Birth rate and body weight - Cr
	Latencies PTZ
		Latencies SS	Latencies PTZ - Latencies SS
		Latencies AVP+	Latencies PTZ - Latencies AVP+
		Severity	Latencies PTZ - Severity
		Tabla 1-1	Latencies PTZ - Tabla 1-1
		Latencies AVP-	Latencies PTZ - Latencies AVP-
		Latencies SS vs AVP-1	Latencies PTZ - Latencies SS vs
	Durations PTZ
		Duration SS	Durations PTZ - Duraciones SS
		Duration AVP	Durations PTZ - Duraciones AVP
		Tabla 1-1	Durations PTZ - Tabla 1-1
		Duration VPA per gender	Durations PTZ - Duraciones AV1
		Duration SS per gender	Durations PTZ - Duraciones SS
		Duration SS vs VPA	Durations PTZ - Duraciones SS1
	PILO (Lat y dur)
		Latencies SS	PILO (Lat y dur) - Latencias SS
		Latencies VPA	PILO (Lat y dur) - Latencias AV
		Duration SE	PILO (Lat y dur) - Duracion SE
		Severity	PILO (Lat y dur) - Severidad
		Latencies SS vs VPA	PILO (Lat y dur) - Latencias S1
		Tabla 1-2	PILO (Lat y dur) - Tabla 1-2
		Latencies-total-1	PILO (Lat y dur) - Latencias-to

## Sheet: Birth rate and body weight - bo
body weight VPA males
♂	16.5
♂	18
♂	15.8
♂	17.7
♂	16.5
♂	14.3
♂	16.5
♂	16.6
♂	26.6
♂	25
♂	28.4
♂	24
♂	25
♂	26.6
♂	26.1
♂	28.8
♂	27.5
♂	28.8
♂	29.1
♂	28.8
♂	18.1
♂	17.3
♂	21.4
♂	27.8
♂	26.3
♂	21.6
♂	24.5
♂	25.2
♂	25.2
♂	19
♂	19.3
♂	28.9
♂	21.4
♂	19.7
♂	11.4
♂	15.7
♂	24.4
♂	26.2
♂	26
♂	20.1
♂	25.8
♂	19.9
♂	19.1
♂	23.3
♂	22.8
♂	19.1

## Sheet: Birth rate and body weight - b1
body weight
ANIMALS	Gender	SS	VPA	Gender
1	♀	25.1	16.5	♂
2	♂	28.6	18	♂
3	♂	26.3	15.8	♂
4	♀	24	17.2	♀
5	♂	25.8	17.7	♂
6	♂	27.8	16.5	♂
7	♀	26.8	14.3	♂
8	♂	24	16.5	♂
9	♂	28	16.6	♂
10	♂	30.7	26.6	♂
11	♀	25	25	♂
12	♂	26	24.4	♀
13	♀	25.1	24.4	♀
14	♂	34	28.4	♂
15	♂	32	24	♂
16	♀	32	22.1	♀
17	♀	32	25	♂
18	♀	33	26.6	♂
19	♂	33	26.1	♂
20	♂	30.4	27.6	♀
21	♀	30	28.8	♂
22	♂	30.8	27.5	♂
23	♀	29.8	28.8	♂
24	♀	28.4	27.1	♀
25	♂	31.6	29.1	♂
26	♀	29.6	28.8	♂
27	♀	29.8	27.5	♀
28	♂	27.5	18.1	♂
29	♀	24.9	17.3	♂
30	♀	26.4	16.3	♀
31	♀	26.4	23.5	♀
32	♂	26.3	21.4	♂
33	♀	24.1	27.8	♂
34	♂	30.2	26.3	♂
35	♂	31.2	22.8	♀
36	♂	31.6	21.6	♂
37	♂	30.2	21	♀
38	♂	30	20.5	♀
39	♂	31.2	24.5	♂
40	♀	27.5	24.4	♀
41	♀	24.6	25.2	♂
42	♀	30.7	25.2	♂
43	♂	32.7	19	♂
44	♀	25.5	19.3	♂
45	♂	26.7	28.9	♂
46	♂	27.3	21.4	♂
47	♀	29	19.7	♂
48	♂	29.1	24.6	♀
49	♀	21.8	23.8	♀
50	♀	27.8	11.4	♂
51	♀	26.5	15.7	♂
52	♂	28.2	24.4	♂
53	♀	27.8	26.2	♂
54	♂	28.77	26	♂
55	♀	24.6	26.2	♀
56	♀	23.4	20.1	♂
57	♂	26.6	20.1	♀
58	♂	25.6	25.8	♂
59	♂	26.4	19.9	♂
60	♀	26.4	19.1	♂
61	♀	24.6	23.3	♂
62	♀	28.5	22.8	♂
63	♀	30.8	16.4	♀
64	♂	33	19.1	♂
65	♀	28
66	♂	20.2
67	♀	26.7
68	♀	31.3
Mean	♀= 35	28.0834	22.4375	♀= 18
Desv Stand	♂= 33	2.96505	4.41827	♂= 46
N		68	64
RAIZ DE N		8.24621	8
ERROR		0.359565	0.552284

## Sheet: Birth rate and body weight - b2
body weight VPA Females
♀	17.2
♀	24.4
♀	24.4
♀	22.1
♀	27.6
♀	27.1
♀	27.5
♀	16.3
♀	23.5
♀	22.8
♀	21
♀	20.5
♀	24.4
♀	24.6
♀	23.8
♀	26.2
♀	20.1
♀	16.4

## Sheet: Birth rate and body weight - b3
body weight SS males
Gender	SS
♂	28.6
♂	26.3
♂	25.8
♂	27.8
♂	24
♂	28
♂	30.7
♂	26
♂	34
♂	32
♂	33
♂	30.4
♂	30.8
♂	31.6
♂	27.5
♂	26.3
♂	30.2
♂	31.2
♂	31.6
♂	30.2
♂	30
♂	31.2
♂	32.7
♂	26.7
♂	27.3
♂	29.1
♂	28.2
♂	28.77
♂	26.6
♂	25.6
♂	26.4
♂	33
♂	20.2

## Sheet: Birth rate and body weight - b4
body weight SS females
♀	25.1
♀	24
♀	26.8
♀	25
♀	25.1
♀	32
♀	32
♀	33
♀	30
♀	29.8
♀	28.4
♀	29.6
♀	29.8
♀	24.9
♀	26.4
♀	26.4
♀	24.1
♀	27.5
♀	24.6
♀	30.7
♀	25.5
♀	29
♀	21.8
♀	27.8
♀	26.5
♀	27.8
♀	24.6
♀	23.4
♀	26.4
♀	24.6
♀	28.5
♀	30.8
♀	28
♀	26.7
♀	31.3

## Sheet: Birth rate and body weight - Ta
Tabla 1
ANIMALS	Gender	SS	VPA	Gender
				♂

## Sheet: Birth rate and body weight - Pu
Pups per litter
	SS	VPA
	14	9
	7	5
	14	10
	12	2
	7	13
	8	15
	9	6
	5	5
	11	4
	6	4
	13	2
	9	2
	10	2
	9	1
	1	6
	10	11
	7	8
	5	13
	15	1
	6	1
	12	12
	16	8
	7
	1
	9
	2
	12
	8
	14
	12
Mean	9.03333	6.36364
Desv Stand	3.99554	4.46729
N	30	22
RAIZ DE N	5.47723	4.69042
ERROR	0.729483	0.95243

## Sheet: Birth rate and body weight - Cr
Mating
	SS	VPA	total
mating	46	63	109
deliveries	30	22	52
Success	0.65	0.35
pups	271	140	411

## Sheet: Latencies PTZ - Latencies SS
Latencies SS
SS	Severity	# de CTCG	Gender	myoclonus	Atipic seizure	Minimal seizure	Generalized Clonic seizure	Clonic-tonic seizure	Tonic phase	Recovering	onset SE	Death
1	5	1	♀	36	20			41	53		77	3940
2	5	3	♂	54	35			64	79		105	7107
3	5	2	♂	57	37			58	68		91	5949
4	5	1	♀	63	27			71	102			340
5	5	2	♂	88	30			93	112		145	5320
6	5	1	♂		38			316	321			660
7	5	3	♀	32				58	71	5063	98
8	5	3	♂	55	21			46	72		84	4686
9	5	2	♂	100	30			84	110	13886
10	5	2	♂	48	21			51	70	2527
11	5	1	♀	56	22			145	158			272
12	5	1	♂	57	35	138		207	289	12097	309
13	5	1	♀	42	27			63	139	7847	172
14	5	1	♂	73	23			931	934	6598
15	5	1	♂	53	28			55	74			254
16	5	1	♀	66	28			74	88			261
17	5	1	♀	30	42			77	105			394
18	5	1	♀	61	45	75		157	159			322
19	5	1	♂	37	26			50	68			256
20	5	1	♂	100	24			175	189			441
21	5	3	♀	34	34			41	64		78	4242
22	5	1	♂	60	15			61	81		105	3379
23	5	2	♀		22			41	69		80	3955
24	5	1	♀	29	13		323	313	354			659
25	5	3	♂	37	20			37	46		60	4921
26	5	1	♀	54	29			67	115			554
27	5	1	♀		27			77	105			321
28	5	1	♂		16			61	87		105	4480
29	5	1	♀		18			53	60			230
30	5	1	♀	58	16			75	108		117	5314
31	5	1	♀	46	14			58	80			232
32	5	1	♂	53	19			53	83			343
33	5	1	♀	37	18			37	55			313
34	5	1	♂	46	17			83	87			292
35	5	1	♂	47	21			50	67			316
36	5	1	♂	50	16			56	60			336
37	5	1	♂	22	35			49	90			378
38	5	1	♂	36	27			49	52		68	7419
39	5	1	♂		13			54	57			238
			Mean	52.0303	24.9737	106.5	323	105.923	127.718	8003	112.933	2064.36	#DIV/0!	#DIV/0!	#DIV/0!
			Desv Stand	18.5143	8.30983	44.5477	#DIV/0!	150.774	150.15	4289.5	61.5995	2414.89	#DIV/0!	#DIV/0!	#DIV/0!
			N	33	38	2	1	39	39	6	15	33	0	0	0
			RAIZ DE N	5.74456	6.16441	1.41421	1	6.245	6.245	2.44949	3.87298	5.74456	0	0	0
			ERROR	3.22293	1.34803	31.5	#DIV/0!	24.1431	24.0433	1751.18	15.9049	420.378	#DIV/0!	#DIV/0!	#DIV/0!

[truncated: 18 more sheets: Latencies PTZ - Latencies AVP+, Latencies PTZ - Severity, Latencies PTZ - Tabla 1-1, Latencies PTZ - Latencies AVP-, Latencies PTZ - Latencies SS vs, Durations  PTZ - Duraciones SS, Durations  PTZ - Duraciones AVP, Durations  PTZ - Tabla 1-1, Durations  PTZ - Duraciones AV1, Durations  PTZ - Duraciones SS , Durations  PTZ - Duraciones SS1, PILO (Lat y dur) - Latencias SS, PILO (Lat y dur) - Latencias AV, PILO (Lat y dur) - Duracion SE, PILO (Lat y dur) - Severidad, PILO (Lat y dur) - Latencias S1, PILO (Lat y dur) - Tabla 1-2, PILO (Lat y dur) - Latencias-to]
